# Supplementary material for: Superoxide radicals have a protective role during H2O2 stress
Source: PubMed Central journal article supplement — Mol Biol Cell. 2013 Sep 15;24(18):2876–84. doi: 10.1091/mbc.E13-01-0052 (PMC3771949; doi:10.1091/mbc.e13-01-0052), 2013-09-15
Supplement: supp_E13-01-0052_CombinedSupMats.pdf [file supp_E13-01-0052_CombinedSupMats.pdf]

# Supplemental Materials

*Molecular Biology of the Cell*

Thorpe et al.

**Supplementary Table 1. Survival and colony-forming ability of the wild type and respiratory mutants after treatment with 4 mM H<sub>2</sub>O<sub>2</sub>.**

Cells of the wild type and mutants were grown in YEPD to OD<sub>600</sub> 4 and each culture was split into one control sample and one sample treated with 4 mM H<sub>2</sub>O<sub>2</sub> for 60 minutes. Samples of treated and untreated cultures were diluted appropriately for plate counts on YEPD plates, and were also taken for propidium iodide staining to determine cell viability as indicated in the Materials and Methods.

| Strain | % survival | % PI positively stained cells         |           |
|--------|------------|---------------------------------------|-----------|
|        |            | H <sub>2</sub> O <sub>2</sub> treated | untreated |
| wt     | 57.4       | 0.2                                   | 0.2       |
| ndi1   | 34.3       | 1.5                                   | 0.63      |
| cor1   | 3.7        | 0.17                                  | 0.1       |
| atp1   | 3.8        | 0.17                                  | 0.17      |
| mrpl25 | 4.0        | 0.17                                  | 0.1       |
| cbp3   | 11.9       | 0.2                                   | 0.3       |
| nde1   | 3.9        | 0.17                                  | 0.37      |
| cyt1   | 4.3        | 0.17                                  | 0.17      |
| sdh1   | 29.4       | 0.1                                   | 0.13      |
| coq1   | 29.1       | 0.17                                  | 0.1       |
| rho0   | 14.9       | 0.47                                  | 0.47      |
| cox6   | 16.5       | 0.2                                   | 0.2       |
